# Supplementary material for: Mutation Scanning in a Single and a Stacked Genetically Modified (GM) Event by Real-Time PCR and High Resolution Melting (HRM) Analysis
Source: MDPI journal article supplement (doi:10.3390/ijms151119898), 2014-10-31
Supplement: s1 [file s1]

# Supplementary Information

**Figure S1.** Amplification curves of two samples with similar  $C_t$  values of the primary 5'-GT73 Scorpion PCR screening. Genomic samples 14 (blue), 18 (red), and the no template control (ntc) (grey) are shown. The  $C_t$  values can be found in Table 1 and Table S1.

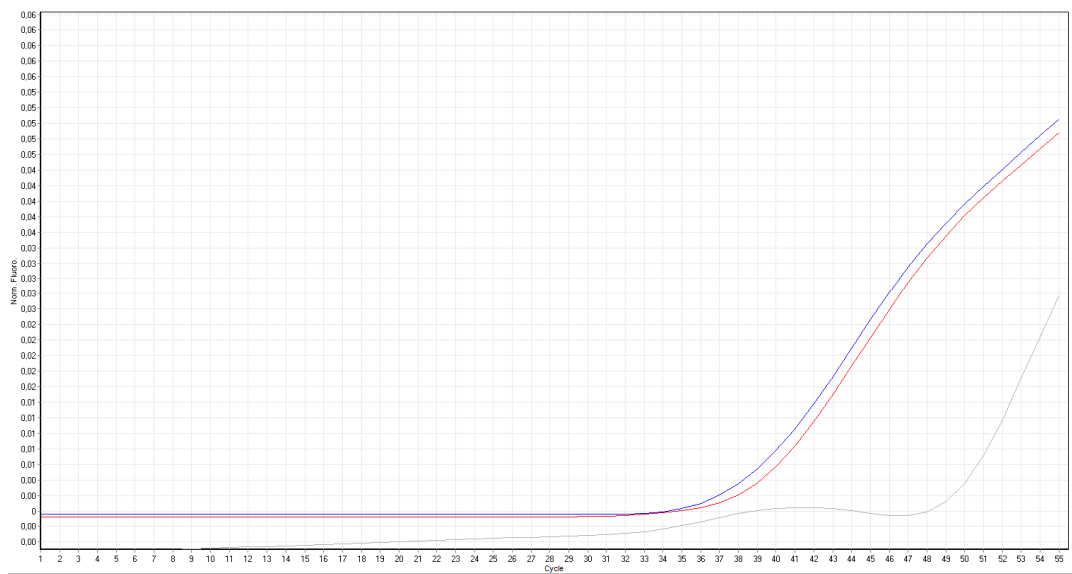

**Figure S2.** Amplification curves of the primary 3'-MON810 real-time PCR screening with subsequent HRM analysis. Genomic samples 264 (green), 323 (blue), the reference = VT3 pool (red), and the ntc (grey) are shown. The  $C_t$  values are 29.26 (sample 264), 30.90 (sample 323), and 30.81 (VT3 pool).

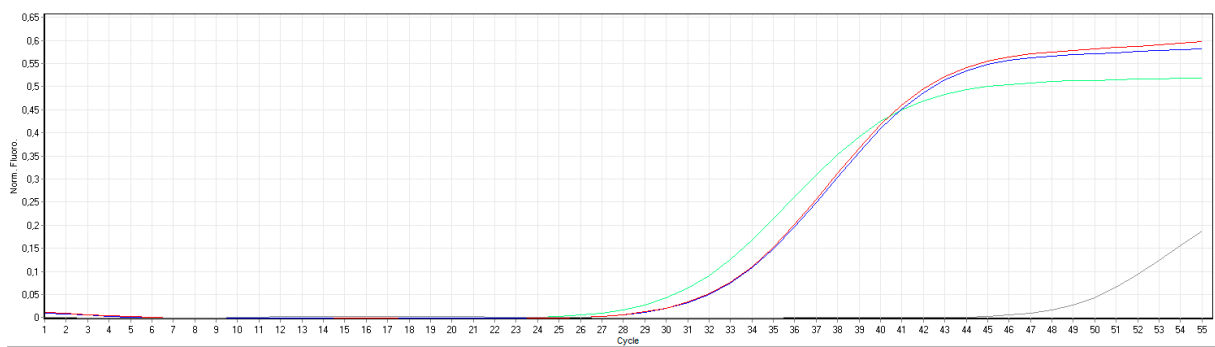

**Figure S3.** Normalized HRM graph of the 3'-MON810 HRM analysis. Genomic samples 264 (green), 323 (blue), and the reference = VT3 pool (red) are shown. The confidence values (%) are 1.23 (sample 264), 97.03 (sample 323), and 100.00 (reference).

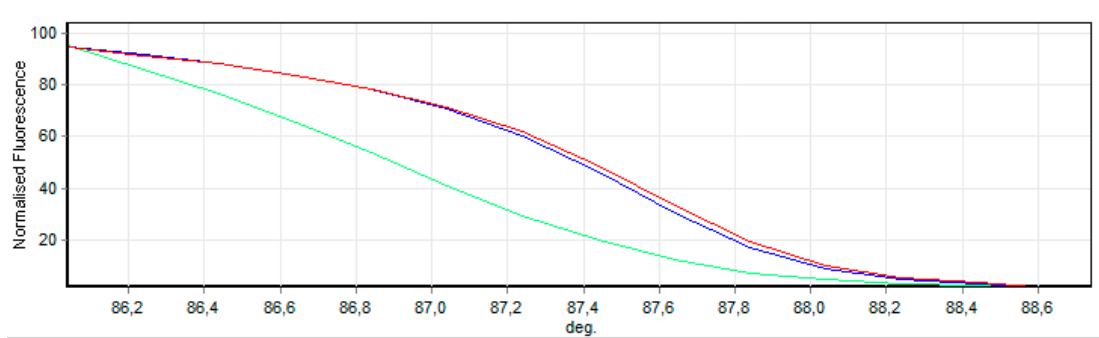

**Figure S4.** Difference HRM graph of the 3'-MON810 HRM analysis. Genomic samples 264 (green), 323 (blue), and the reference = VT3 pool (red) are shown. The confidence values (%) are 1.23 (sample 264), 97.03 (sample 323), and 100.00 (reference).

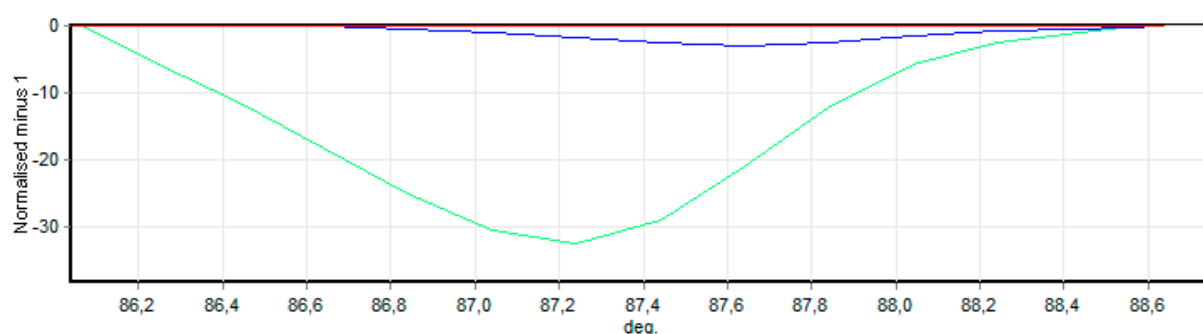

**Table S1.** All  $C_t$  and confidence values of selected samples of the primary screening of the 5'-GT73 region in oilseed rape samples by real-time PCR employing Scorpion primers and by HRM analysis. This table contains supplementary information of Table 1.

| Sample | $C_t$ Value | Confidence Value |
|--------|-------------|------------------|
| 13     | 51.84       | 79.97            |
| 14     | 47.64       | 65.92            |
| 18     | 48.30       | 30.23            |
| 20     | 45.77       | 47.56            |
| 30     | 45.93       | 73.56            |
| 40     | 46.67       | 24.87            |
| 118    | 40.54       | 35.13            |
| 137    | 43.81       | 11.80            |
| 152    | 46.57       | 2.86             |
| 153    | 37.69       | 9.17             |
| 156    | 39.48       | 9.11             |
| 157    | 41.92       | 17.55            |
| 170    | 45.11       | 39.61            |
| 175    | 41.40       | 37.49            |
| 333    | 42.67       | 10.15            |
